# Supplementary material
Source: PubMed Central journal article supplement (PMC4253719)
Supplement: NIHMS624305-supplement-01.pdf [file NIHMS624305-supplement-01.pdf]

Supplemental Figure 1: Consolidated Standards of Reporting Trials Diagram for a Randomized Controlled Trial of Cognitive-Behavioral Therapy (CBT) vs. Waitlist (WL) Groups.

Tx = treatment. (Goldin et al., 2012; reprinted with permission from American Psychological Association).

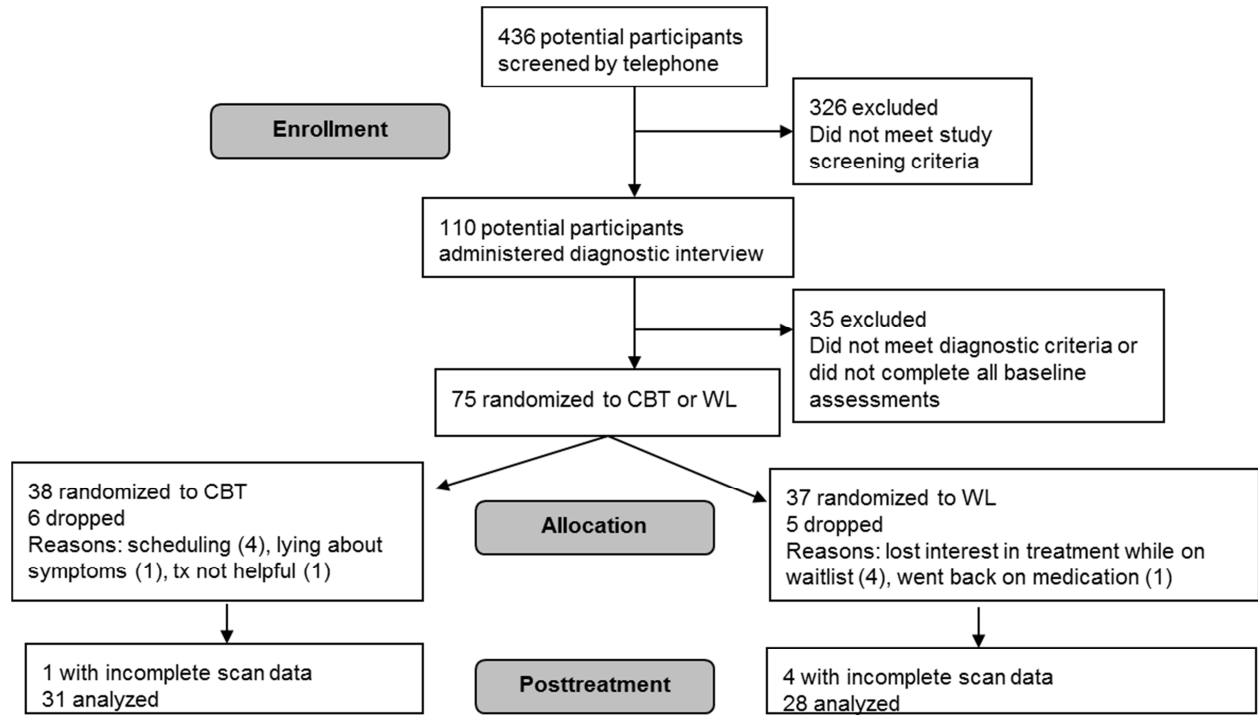

Supplemental Figure 2: Right Anterior Medial Prefrontal Cortex-Seeded Differential Context-Dependent Functional Connectivity for Reappraise Criticism vs. Asterisk Counting and React Criticism vs. Asterisk Counting at Post-CBT

A. React Criticism Functional Connectivity

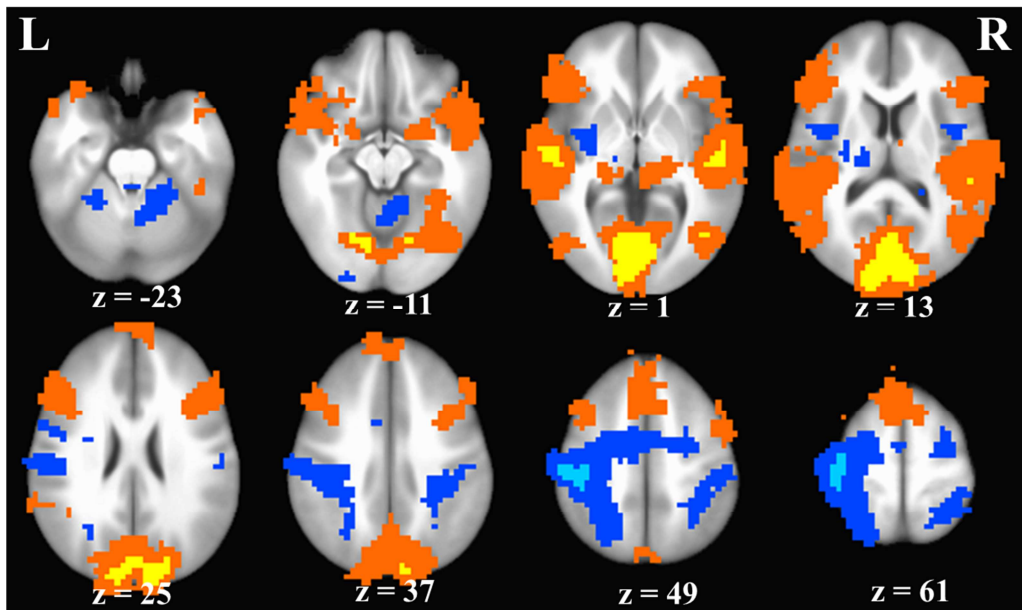

B. Reappraise Criticism Functional Connectivity

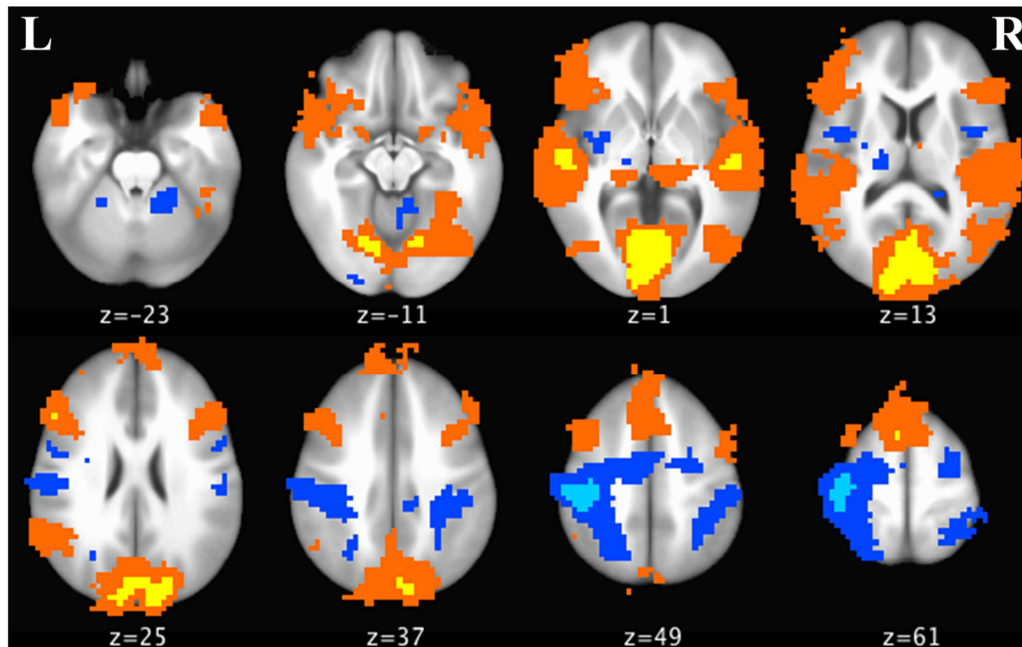

Supplemental Table 1: 32 Social Criticism and 16 Social Praise Statements Used  
in the Social Evaluation Task

|                                                                                                                                                                                                                                                                                                                                                                                                                                                                                                                                                                                               |                                                                                                                                                                                                                                                                                                                                                                                                                                                                                                                                                                                      |
|-----------------------------------------------------------------------------------------------------------------------------------------------------------------------------------------------------------------------------------------------------------------------------------------------------------------------------------------------------------------------------------------------------------------------------------------------------------------------------------------------------------------------------------------------------------------------------------------------|--------------------------------------------------------------------------------------------------------------------------------------------------------------------------------------------------------------------------------------------------------------------------------------------------------------------------------------------------------------------------------------------------------------------------------------------------------------------------------------------------------------------------------------------------------------------------------------|
| <p><b><u>Social Criticism Statements</u></b></p> <p>You seem socially awkward<br/>I don't enjoy talking with you<br/>I don't like the way you dress<br/>I don't approve of you<br/>You don't seem very smart<br/>You've lost my interest<br/>I feel uncomfortable being with you<br/>No one is drawn to you<br/>I don't want to spend more time with you</p> <p>You would not make a good leader<br/>You don't seem courageous<br/>You're a boring person<br/>I don't find you very attractive<br/>Do you always look so run down<br/>I don't trust you<br/>You haven't accomplished much</p> | <p>Most people don't really like you<br/>Everyone Thinks you are so weird<br/>You're not very impressive<br/>You never know what to say<br/>You seem anxious<br/>Your laugh annoys me<br/>People don't enjoy being around you<br/>You're not exactly what I'm looking for<br/>I worry about you fitting in<br/>You don't seem to be a very confident person<br/>I don't like you<br/>I don't care for your sense of humor<br/>I don't want to get to know you more<br/>You have made a bad impression on me<br/>I am not very impressed with you<br/>You don't have a nice smile</p> |
| <p><b><u>Social Praise Statements</u></b></p> <p>I am very impressed with you<br/>I feel really comfortable being with you<br/>You would make a good leader<br/>You have a nice smile<br/>People enjoy being around you<br/>You're an interesting person<br/>You seem really courageous<br/>I don't worry about you fitting in</p>                                                                                                                                                                                                                                                            | <p>You always know what to say<br/>You're engaging<br/>I want to get to know you more<br/>You're exactly what I'm looking for<br/>You seem very smart<br/>You've accomplished a lot<br/>Do you always look so well<br/>Everyone thinks you are so nice</p>                                                                                                                                                                                                                                                                                                                           |
